# Supplementary material for: Complementarity Between Investment in Information Technology (IT) and IT Human Resources: Implications for Different Types of Firm Innovation
Source: Atypon-hosted journal article supplement (doi:10.1287/isre.2022.1185), 2022-11-29
Supplement: isre.2022.1185.sm1.pdf [file isre.2022.1185.sm1.pdf]

## Appendix. Selected IS Studies Operationalizing Corporate Innovation

| <b>Authors and Year</b>                      | <b>Article Title</b>                                                                                                                          | <b>Operationalization of Innovation</b>                                                                                                                                                                   |
|----------------------------------------------|-----------------------------------------------------------------------------------------------------------------------------------------------|-----------------------------------------------------------------------------------------------------------------------------------------------------------------------------------------------------------|
| Gao and Hitt (2012)                          | Information technology and trademarks: Implications for product variety                                                                       | Level of trademark holdings, rate of new trademark applications, survival rate of trademark applications.                                                                                                 |
| Kleis, Chwelos, Ramirez, and Cockburn (2012) | Information technology and intangible output: The impact of IT investment on innovation productivity                                          | Citation-weighted patent count                                                                                                                                                                            |
| Ravichandran, Han, and Mithas (2017)         | Mitigating diminishing returns to R&D: The role of information technology in innovation                                                       | Citation-weighted patent count                                                                                                                                                                            |
| Saldanha, Mithas, and Krishnan (2017)        | Leveraging customer involvement for fueling innovation: The role of relational and analytical information processing capabilities             | Number of patents                                                                                                                                                                                         |
| Branstetter, Drev, and Kwon (2019)           | Get with the Program: Software-Driven Innovation in Traditional Manufacturing                                                                 | Number of patents, number of claims found in patent document, number of forward citations generated by patent                                                                                             |
| Wu, Lou, and Hitt (2019)                     | Data analytics supports decentralized innovation                                                                                              | Novel patent (development of new technology class); Patent that creates new combination of existing technology classes; Patent that reuse existing technology                                             |
| Wu, Hitt, and Lou (2020)                     | Data analytics, innovation, and firm productivity.                                                                                            | Historical stock of total patents; knowledge diversity in patents; novelty of patents; survey data about innovation practices                                                                             |
| This study                                   | Complementarity between investment in information technology (IT) and IT human resources: Implications for different types of firm innovation | Number of patents; stock market value of patents, number of patents based on existing knowledge; number of patents based on new knowledge; number of IT-related patents; number of non-IT-related patents |
